# Supplementary material for: Disulfidptosis status influences prognosis and therapeutic response in clear cell renal cell carcinoma
Source: publisher site journal article supplement (doi:10.18632/aging.205405), 2024-01-24
Supplement: Supplementary file [file aging-v16i2-205405-supplementary-material-SD1.pdf]

SUPPLEMENTARY FIGURES

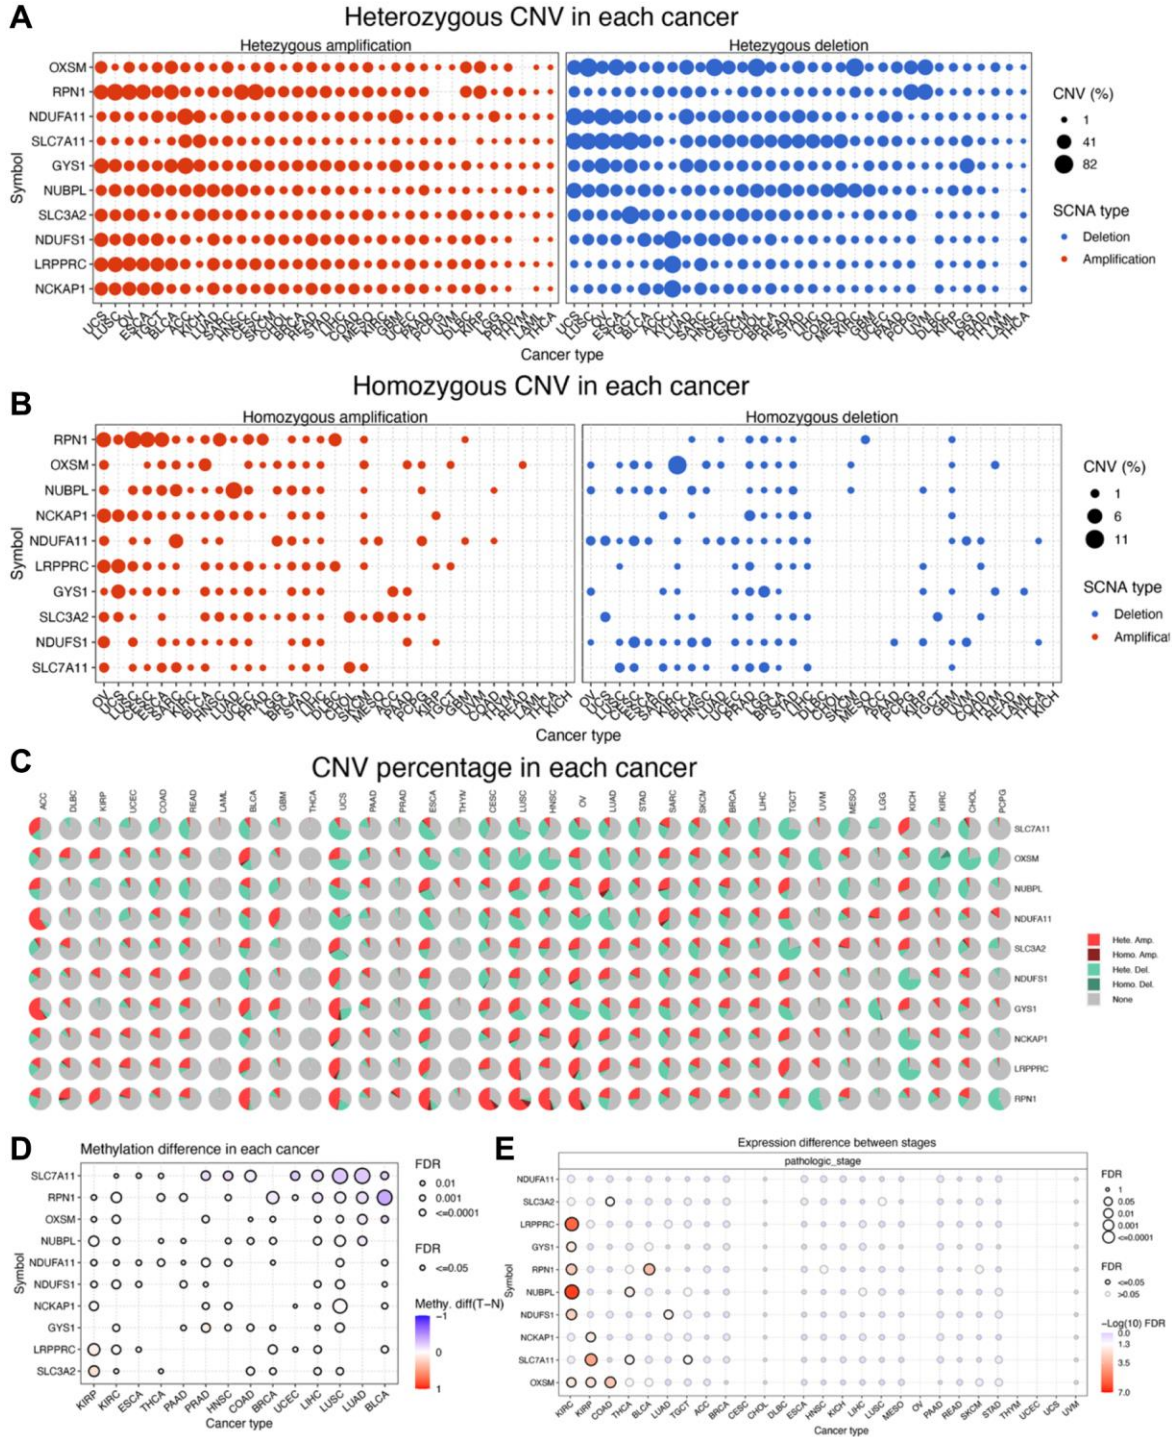

**Supplementary Figure 1. Pan-cancer analysis of genetic changes in disulfidptosis-related molecules.** (A, B) A CNV bubble chart showing the distribution of (A) heterozygous and (B) homozygous CNV of disulfidptosis-related molecules in each type of cancer. (C) A CNV pie distribution showing the constitution of heterozygous/homozygous CNV of disulfidptosis-related molecules in each type of cancer. (D) A bubble chart showing the differences in methylation of disulfidptosis-related molecules between normal and tumor tissues. (E) A bubble chart showing the correlation between tumor stage and mRNA expression levels.

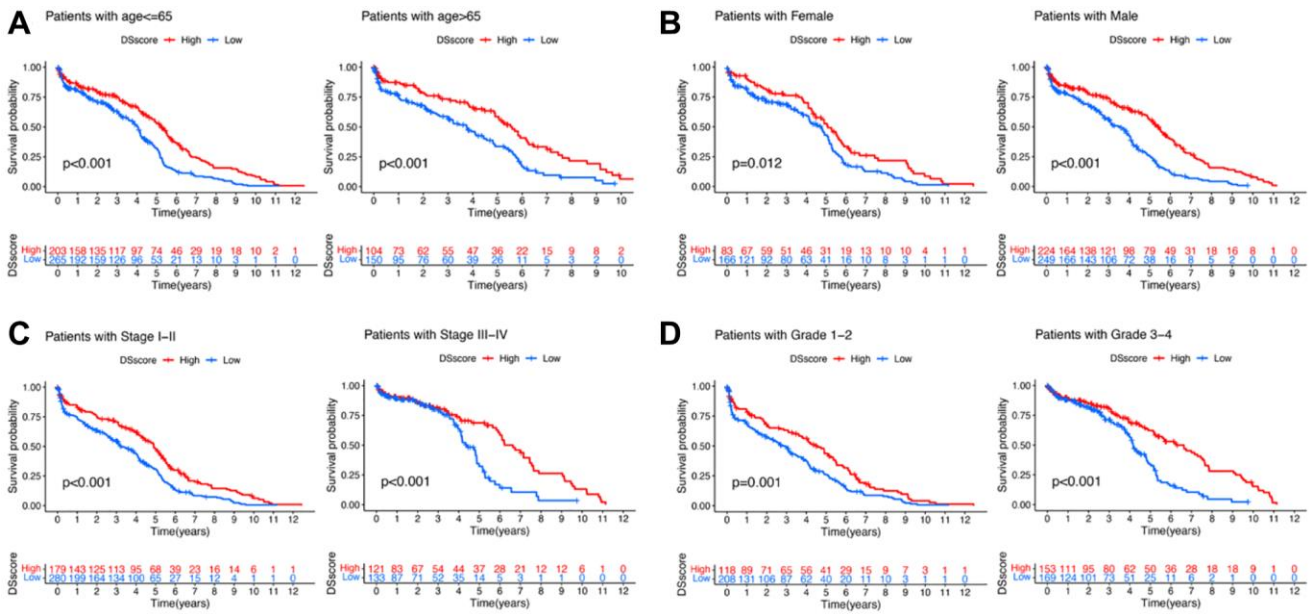

**Supplementary Figure 2. Clinical evaluation of the DSscore.** Survival analysis of various DSscore groups of patients with KIRC based on age (A), sex (B), grade (C), and (D) stage.

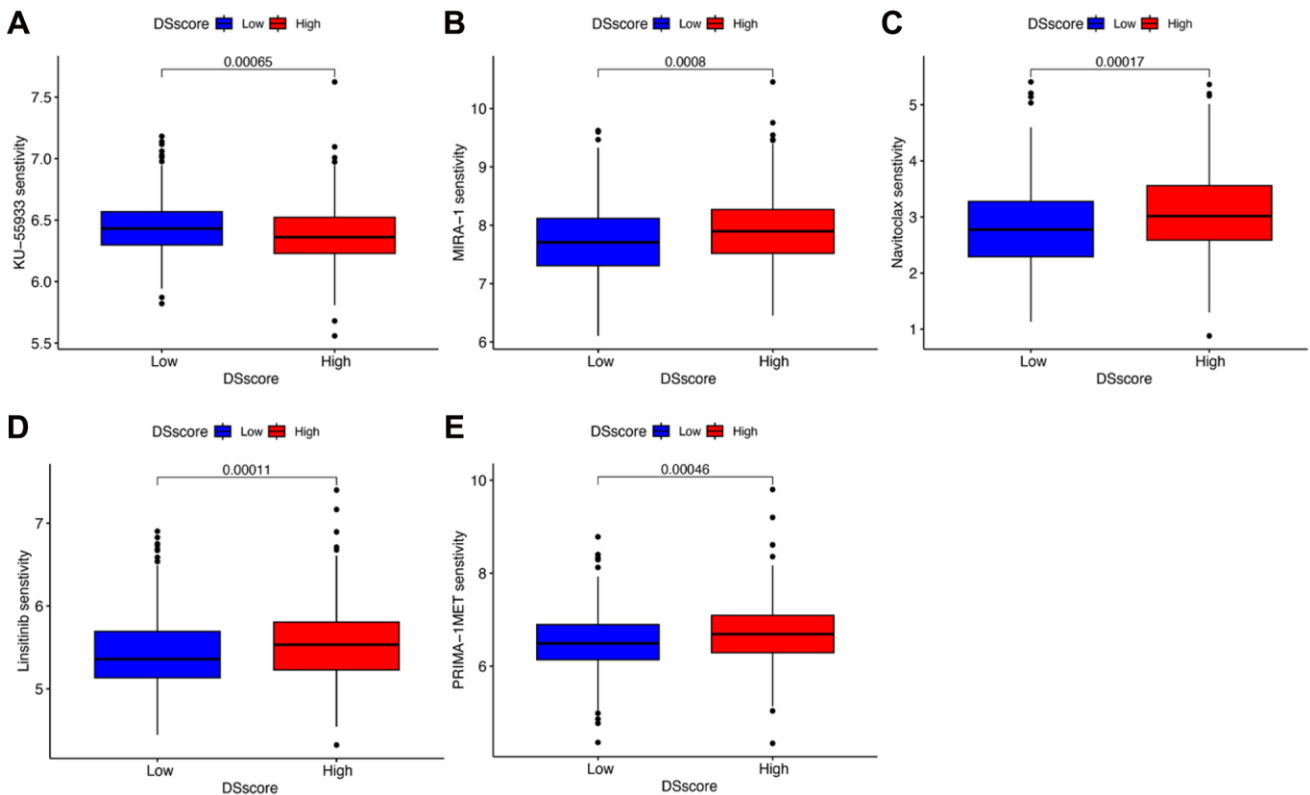

**Supplementary Figure 3. Drug sensitivity analysis of the low- and high-DSscore groups.** (A) KU-55933. (B) MIRA-1. (C) Navitoclax. (D) Linsitinib. (E) PRIMA-1MET.

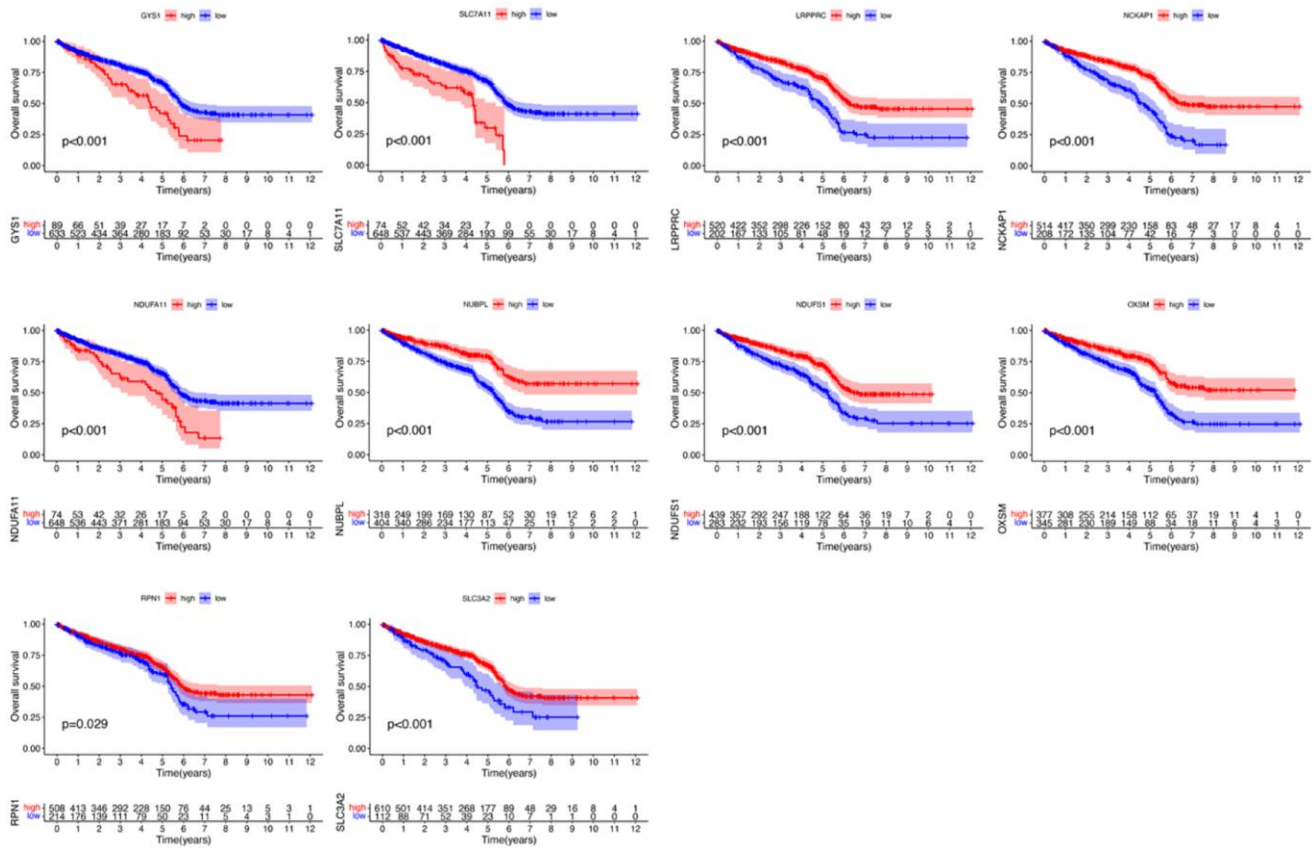

Supplementary Figure 4. Kaplan–Meier survival curves of 10 disulfidptosis-related molecules in the low- and high-DSscore groups.

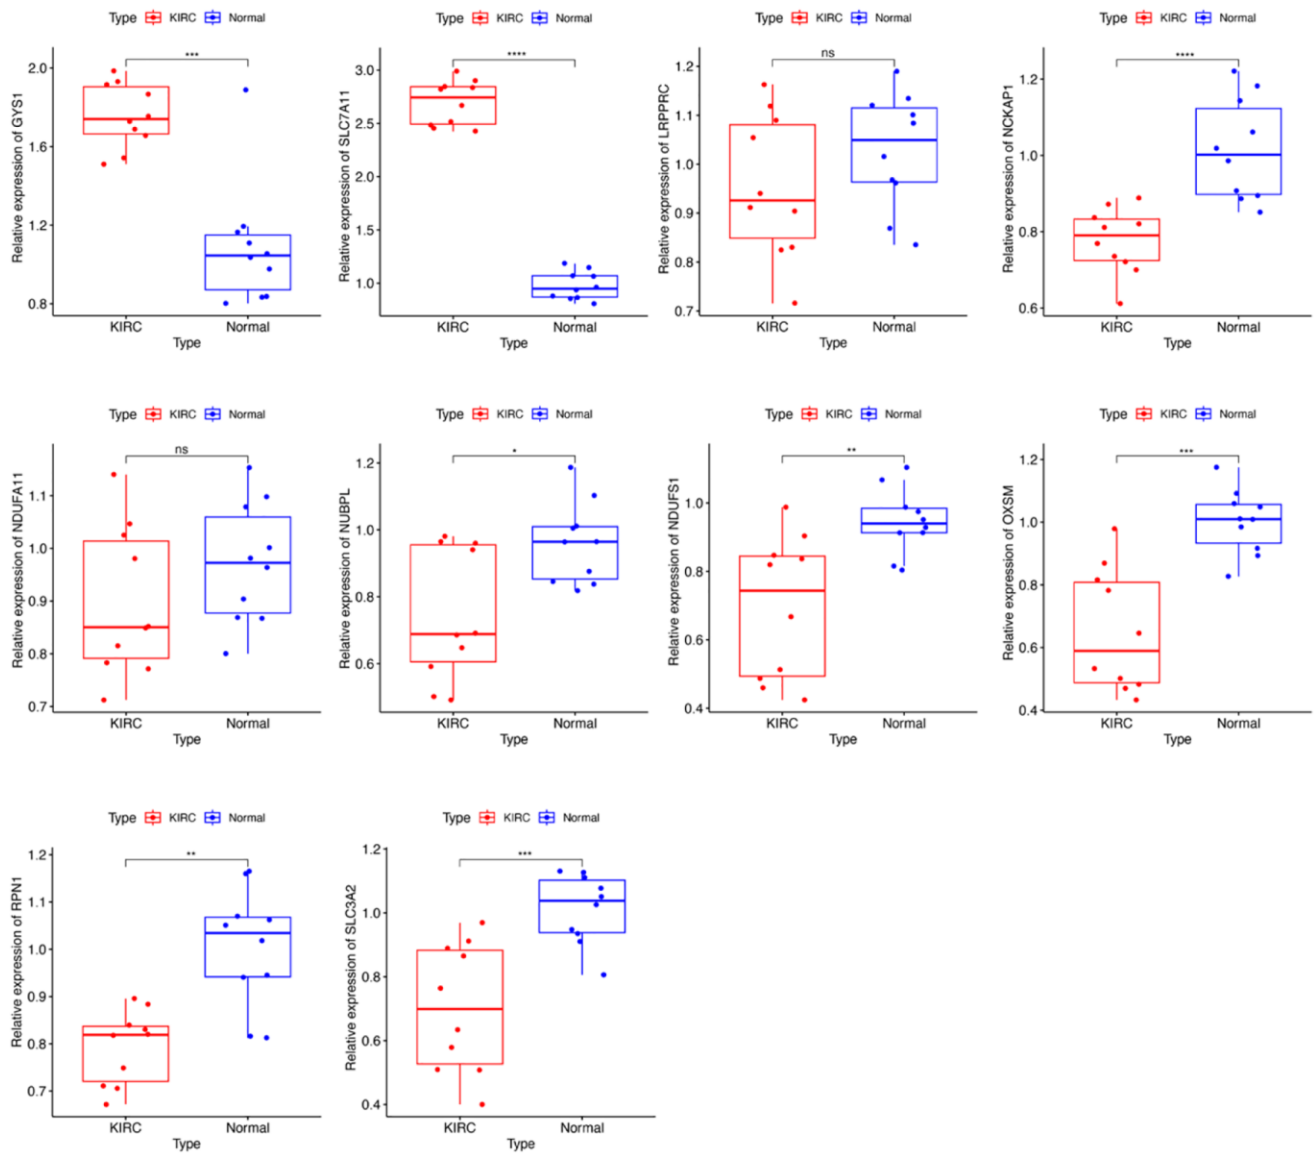

**Supplementary Figure 5. Expression levels of 10 disulfidptosis-related molecules in KIRC tissues and corresponding normal tissues as revealed by qRT-PCR.**

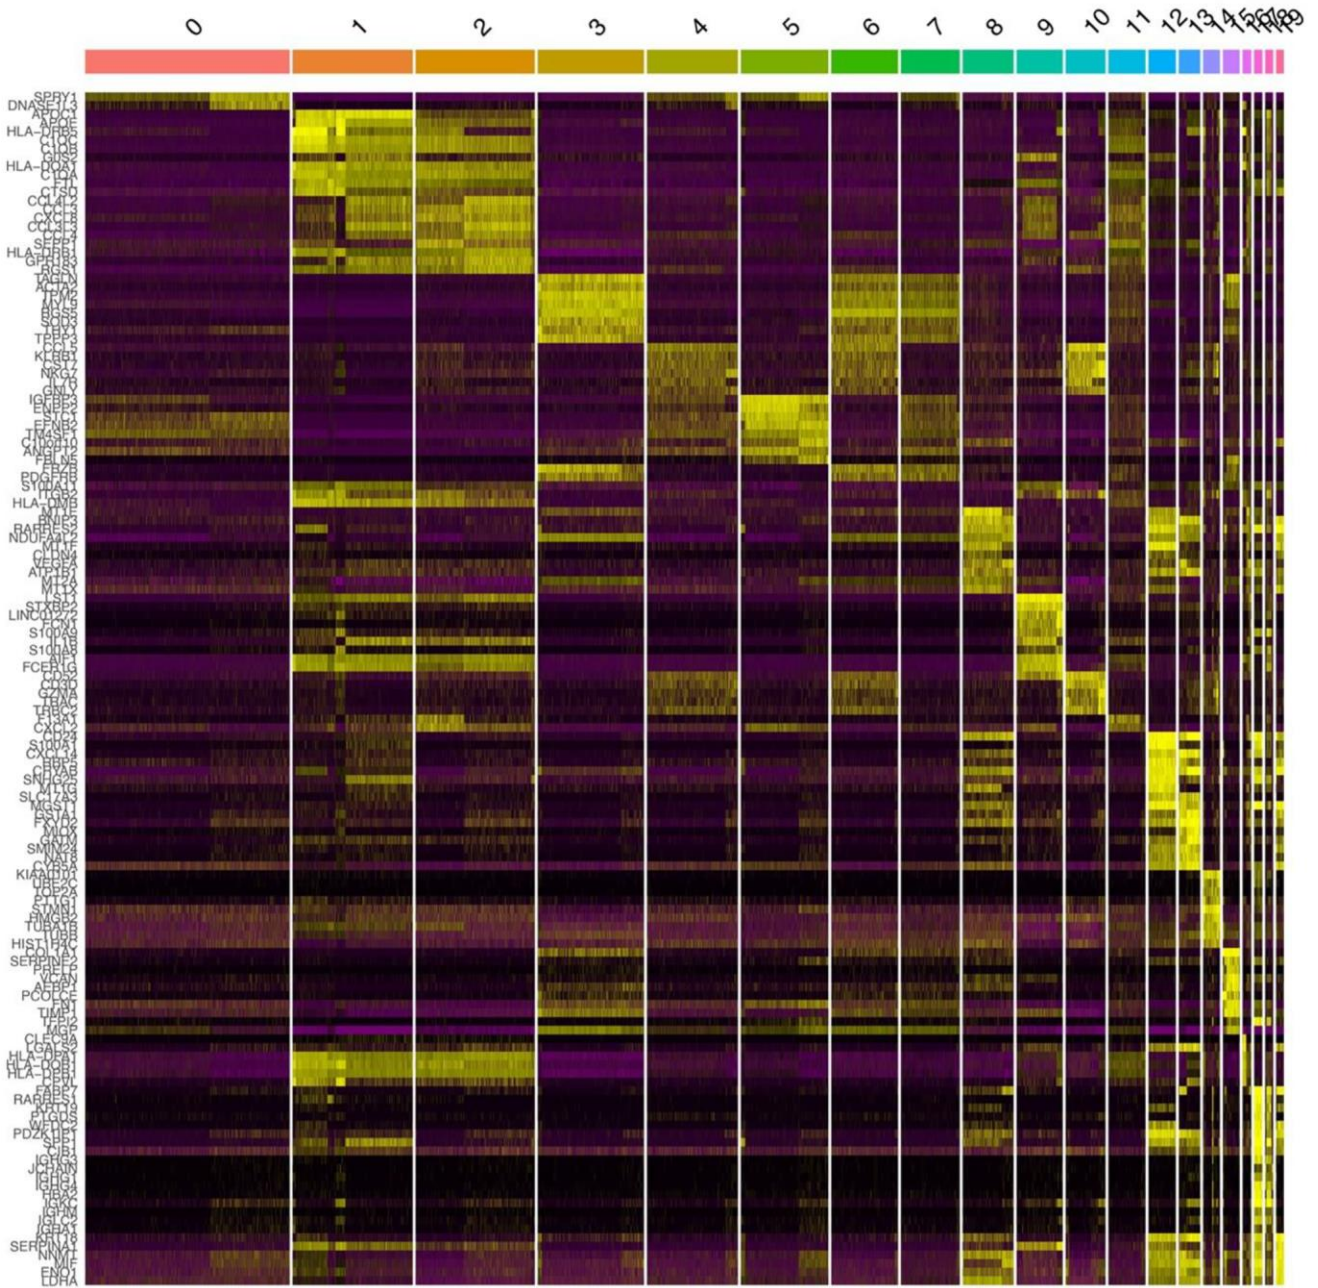

Supplementary Figure 6. Expression analysis of identified marker genes and the top 10% visualized on a heat map.
